# Supplementary material for: Compass cues used by a nocturnal bull ant, Myrmecia midas
Source: Oxford University Press journal article supplement (doi:10.1242/jeb.152967), 2017-01-01
Supplement: jeb152967supp.pdf [file jeb152967supp.pdf]

**Nest 1: Panorama of the nest site**

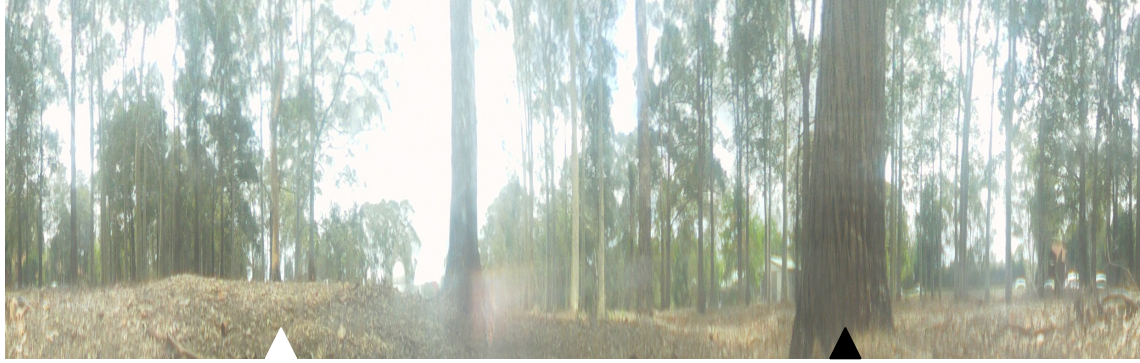

**Nest 1: Panorama of the displacement site**

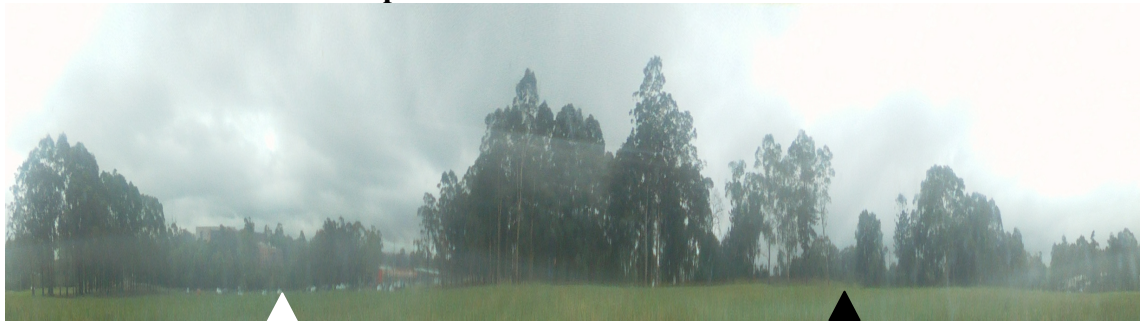

**Nest 3: Panorama of the nest site**

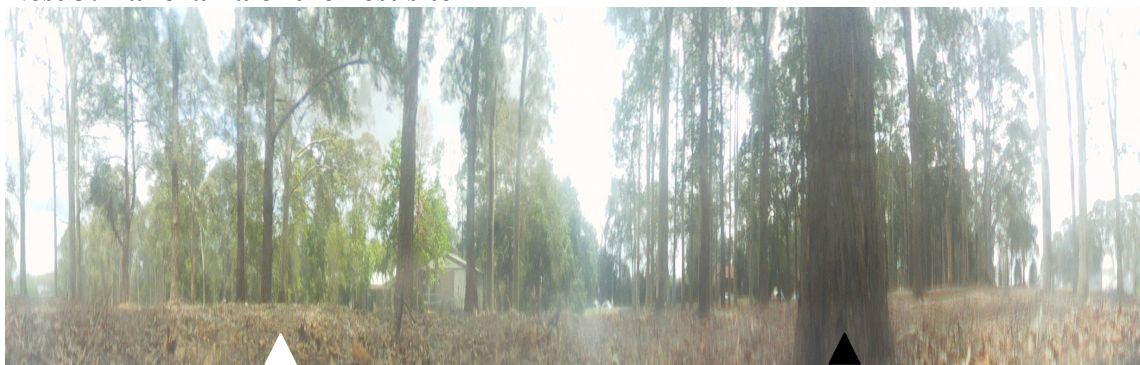

**Nest 3: Panorama of the displacement site**

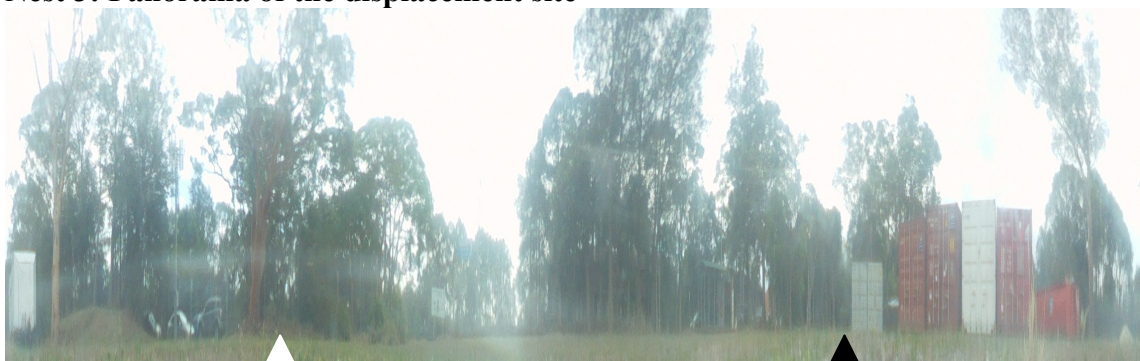

**Fig. S1** 360° Panoramic images of the nest sites 1 & 3 and displacement sites for the Outbound Long Vector 15min Delay 100m condition. Images were taken with a HD bloggie camera with a panoramic lens (Sony). Black triangles in all images denote the direction of the nest. White triangles denote the direction of the foraging tree in the nest site images and the vector direction at the displacement sites.
